# Supplementary material for: Multivariate genome-wide association study of rapid automatised naming and rapid alternating stimulus in Hispanic American and African–American youth
Source: PubMed Central journal article supplement — J Med Genet. 2019 Apr 17;56(8):557–66. doi: 10.1136/jmedgenet-2018-105874 (PMC6678051; doi:10.1136/jmedgenet-2018-105874), 2019-04-17
Supplement: jmedgenet-2018-105874supp001.pdf [file jmedgenet-2018-105874supp001.pdf]

## **SUPPLEMENTAL MATERIALS AND METHODS**

### **Discovery Analysis**

#### **Genes, Reading, and Dyslexia Study**

The Genes, Reading, and Dyslexia (GRaD) study, is a multisite case-control study of RD in minority youth across the United States, Canada, and Puerto Rico. Detailed descriptions of recruitment, inclusion, and exclusion criteria for the sample are reported elsewhere [1]. Briefly, male and female children age 8-15 years of African American and/or Hispanic American ancestry were recruited for study (Table S1). Children were excluded if they were not of African American or Hispanic American ancestry, had less than 3 years of primary educational instruction in English, placed in foster care, had a medical history or neurological condition that could affect cognitive or neural development (i.e. preterm birth, prolonged stay in the NICU, seizures, acquired brain injuries), diagnosis of any cognitive or neuropsychiatric disorder (i.e. intellectual disability, autism spectrum disorder, depression), or documented hearing or vision impairment. Inclusion criteria for participants likely to have a reading disability included either history of poor reading skills (as documented by prior school or clinical testing), report of skills falling below expected level for age or grade, and/or provision of special services in the area of reading. For inclusion of participants likely to be controls, inclusion criteria were “competent reading skills” as identified by reading skills at or above current expectations for grade and performance above the 40th percentile on standardized school or clinical testing. A total of 1,432 unrelated children were recruited into the GRaD study. Of these subjects, 1,331 children with high-quality DNA samples were included in the analysis. Informed consent was obtained for all participants and parents or legal guardians of subjects. Ethical approval of study protocols and recruitment was obtained by Institutional Review Boards at each recruiting site (University of

1 Colorado-Boulder, University of Denver, Tufts University, University of New Mexico, Kennedy  
2 Krieger Institute, Hospital for Sick Children-Toronto, and Yale University).

### 3 **Rapid Automatized Naming (RAN) and Rapid Automatized Stimulus Measures (RAS)**

4 RAN and RAS performance in the GRaD sample was evaluated using the RAN Objects,  
5 RAN Letters, and RAS Letters/Numbers tasks developed by Wolf and Denckla [2]. For RAN  
6 Objects and RAN Letters, subjects name aloud 50 familiar, high frequency objects or letters,  
7 respectively, arranged in a  $5 \times 10$  array as quickly and accurately as possible. The format of RAS  
8 Letters/Numbers is similar to RAN Objects and RAN Letters, except that items in the array are  
9 from alternating stimulus categories (e.g. letters and numbers). Time to complete each task is  
10 recorded and converted to age-standardized scores. Age-standardized scores (mean of 100, SD of  
11 15) were then converted to z-scores (mean of 0, SD of 1) used for downstream genetic analyses  
12 (Table S2).

### 13 **Test of Word Reading Efficiency (TOWRE)**

14 The TOWRE Total Word Reading Efficiency is a composite of both Sight Word  
15 Efficiency and Phonetic Decoding Efficiency scores and is an assessment of reading fluency (the  
16 ability to read words quickly and accurately) under timed conditions [3]. For this assessment, the  
17 subject is evaluated on the number of individual words (Sight Word Efficiency) and nonwords  
18 (Phonetic Decoding Efficiency) correctly read in 45 seconds. For each subtest, the total number  
19 of words read correctly is converted into a standard score based on age norms and then converted  
20 to a z-score (Table S2). The TOWRE Total Word Reading Efficiency composite was used for  
21 downstream analysis.

### 22 **Woodcock–Johnson Tests of Achievement, Third Edition (WJ-III)**

1           The WJ-III Basic Reading Score is a composite of the WJ-III Letter-Word Identification  
2 and WJ-III Word Attack subtests [4]. The WJ-III Letter Word Identification subtest is an  
3 untimed measure of reading increasingly complex English words aloud. The Word Attack  
4 subtest is a decoding measure of nonwords or pseudowords in isolation. For each subtest, the  
5 total number of words read correctly is converted into a standard score based on age norms and  
6 then converted to a z-score (Table S2). The WJ-III Basic Reading composite was used for  
7 downstream analysis.

## 8 **DNA Collection, Genotyping, and Analysis**

9           Saliva was collected from each GRaD subject using the Oragene-DNA self-collection kit  
10 (OG-500; DNA Genotek Inc, Ottawa, Ontario, Canada). DNA was extracted using prepIT-L2P  
11 (DNA Genotek Inc, Ottawa, Ontario, Canada). Subjects were successfully genotyped for  
12 2,391,739 single nucleotide polymorphisms (SNPs) using the Illumina Infinium Omni2.5-8  
13 BeadChip at the Yale Center for Genome Analysis (Orange, CT). Initial genotyping quality  
14 control and SNP genotype calls were conducted using GenomeStudio (Illumina, San Diego, CA)  
15 and standard Infinium genotyping data analysis parameters to optimize genotyping accuracy.  
16 SNPs were removed from downstream analysis if they had missingness greater than 5%  
17 (n=22,849), Hardy-Weinberg equilibrium  $p < 0.0001$  (n=116,259), were not autosomal  
18 (n=60,551), or had a minor allele frequency (MAF) less than 5% (n=926,457). Samples were  
19 removed if they were missing more than 3% of their genotypes (n=39), if there were  
20 discrepancies between reported and inferred sex based on X chromosome heterozygosity (n=52),  
21 and IBD  $> 0.125$  calculated using REAP (n=10) [5]. After quality control, there were a total  
22 1,331 samples genotyped with 1,265,623 SNPs.

## 23 *Population Stratification*

1 Principal components (PCs) derived from genome-wide SNP data were used to correct  
2 for genomic inflation due to allele frequency differences across different ancestries (population  
3 stratification) were computed using EIGENSTRAT [6] (Figure S1). Visual inspection of a scree  
4 plot depicting the cumulative percent explained by each successive PC was used to determine the  
5 number of PCs needed for ancestry correction (Figure S2). A bend in the plot plus the  
6 subsequent PC dictated the number of PCs used. Adequate correction for population  
7 stratification was evaluated using a genomic inflation factor ( $\lambda$ ) calculated using the R package  
8 GenABEL and PLINK v1.9 [7]. A  $\lambda$  factor below the standard threshold of 1.05 indicates  
9 sufficient correction for population stratification. For the full GRaD sample, three PCs were used  
10 as covariates to correct for population stratification (Figure S1 and S2A).

11 Hispanic American and African American ancestry in the GRaD sample was determined  
12 based on genetic similarity to 1000 genomes reference populations ASW (Americans of African  
13 Ancestry in Southwest USA) and AMR (Ad Mixed American), which consists of individuals  
14 with Mexican Ancestry from Los Angeles USA (MXL), Puerto Ricans from Puerto Rico (PUR),  
15 Colombians from Medellin, Colombia (CLM), and Peruvians from Lima, Peru (PEL). A PC  
16 analysis in EIGENSTRAT was conducted on a combined AMR and ASW sample set using SNPs  
17 that intersected with the GRaD sample. Calculated eigenvectors were then projected on to the  
18 GRaD sample. Resultant eigenvectors from the AMR, ASW, and GRaD Study subjects were  
19 then clustered by k-means clustering into two groups using the first three PCs. Clusters were  
20 labeled by visually comparing centroids against the projection of the AMR and ASW reference  
21 populations. GRaD subjects that clustered with the AMR reference population were considered  
22 Hispanic American, while subjects clustering with the ASW reference population were African  
23 American (Figure S3).

1 An independent set of genetic ancestry specific PCs in the GRaD sample, stratified based  
2 on cluster identity with 1000 genomes populations AMR and ASW, were generated using  
3 EIGENSTRAT. The first three and first two PCs were used to correct for population  
4 stratification for the Hispanic American and African American clusters, respectfully, for  
5 downstream analyses (Figure S2B and S2C).

### 6 *Statistical Analysis: Multivariate Genome-wide Association Study*

7 Multivariate genetic analysis jointly analyzing RAN Objects, RAN Letters, and RAS  
8 Letters/Numbers for pleiotropic effects was conducted using the R package MultiPhen [8].  
9 MultiPhen allows for the simultaneous examination of multiple correlated traits using a reversed  
10 gaussian regression to determine the linear combination of traits most associated with specific  
11 genotypes at each SNP. It then performs a log likelihood ratio test on the joint model against the  
12 null model to evaluate association. All statistical models using the full GRaD sample were  
13 corrected for the first three PCs to correct for population stratification, sex, age, and  
14 socioeconomic status (SES). In this study, SES was assessed as a binary variable that describes  
15 whether the subject is enrolled in at least 1 government assistance program with a gross (pre-tax)  
16 income eligibility requirement of no more than 130% of the US federal poverty level (e.g. food  
17 stamps, Medicaid, housing choice voucher program, and/or Women, Infants, and Children  
18 program). Age, sex, and SES all account for significant trait variance in RAN Objects, RAN  
19 Letters, and RAS Letters/Numbers using a linear regression model in the full GRaD sample ( $p <$   
20  $0.05$ ). Spanish language use in the home environment was considered as a potential covariate in  
21 the final model, but was removed because it did not significantly explain additional trait variance  
22 the in the full GRaD or Hispanic American subjects. To correct for multiple testing in the

1 genome-wide multivariate GWAS, we used the standard threshold of  $5 \times 10^{-8}$  (Bonferroni  
2 correction for 1 million tests) to determine genome-wide significance.

### 3 *Statistical Analysis: Genome-wide Meta-analysis*

4 Follow-up univariate GWAS on a latent variable of RAN Objects, RAN Letters, and  
5 RAS Letters/Numbers was conducted in the GRaD sample stratified by cluster identity to AMR  
6 or ASW reference populations (Hispanic American and African American, respectfully) and then  
7 used in a meta-analysis (Figure S3). The latent variable reflects an unobservable factor that  
8 influences more than one observed measure and can account for the correlation and covariation  
9 among observed measures [9]. This allows for the examination of genetic factors that contributes  
10 to a “shared” cognitive component of RAN and RAS tasks in a univariate framework. The latent  
11 RAN Objects, RAN Letters, and RAS Letters/Numbers variable was generated using a  
12 confirmatory factor analysis to fit a measurement model, with the goal of explicitly modeling  
13 and segregating measurement error to allow the formation of a single latent naming speed  
14 variable [10]. Mplus version 8 was used, and standard scores on the three RAN tasks were  
15 incorporated as indicators [11]. The model was initially fit for the entire sample, fixing factor  
16 loadings to be equal across ethnic groups. Then, model invariance across ethnic divisions within  
17 the overall sample was evaluated by freeing factor loadings across samples/groups. The resultant  
18 latent naming speed variable was used in a univariate GWAS for Hispanic American and African  
19 American samples, respectively, in PLINK v1.9, while correcting for the effects of age, sex,  
20 SES, and ethnic specific PCs (three for Hispanic American, two for African American) to correct  
21 for intra-ethnic stratification (Figure S2B and S2C). Summary statistics from the ethnic specific  
22 GWASs of the latent naming speed variable were then used in a meta-analysis using a sample

1 size weighted design in METAL [12]. A heterogeneity analysis was also conducted in METAL  
2 to determine whether observed effect sizes were consistent across ethnic samples.

### 3 *Statistical Analysis: Univariate ANCOVA*

4 Univariate ANCOVA testing the top SNP in the multivariate GWAS or RAN Objects,  
5 RAN Letters, and RAS Letters/Numbers, and GWAS meta-analysis of a latent naming speed  
6 variable against measures of reading fluency (TOWRE and WJ-III) in the full GRaD cohort was  
7 conducted in SPSS v.24. Models corrected for the effects of age, sex, SES, and the first three  
8 genome-wide PCs (Figure S2A).

### 9 **Replication Analysis**

#### 10 **Colorado Learning Disability Research Center (CLDRC) Cohort**

11 Replication was conducted on samples from the CLDRC. Methods related to recruitment,  
12 ascertainment, data collection (neurocognitive and genetic), and data processing are described in  
13 detail elsewhere [13 14]. Briefly, the CLDRC sample is a selected twin cohort for RD, ADHD,  
14 and other learning disabilities recruited from 27 school districts in Colorado [14 15]. Subjects  
15 were assessed with RAN Colors, RAN Objects, RAN Letters, and RAN Numbers [16]. For this  
16 task, participants named as many items in a 15 x 5 array as quickly and accurately as possible.  
17 The number of correctly named items in 15 seconds was recorded. Raw scores were standardized  
18 and age-regressed for each of the tasks based on a separate control sample consisting of typically  
19 developing children. All experimental procedures and written informed consent forms were  
20 approved by the institutional review boards (IRB) at University of Colorado-Boulder and  
21 University of Denver.

1 DNA was collected and extracted from saliva and genotyped using the Illumina Human  
2 OmniExpress genotyping panel (713,599 SNPs). Initial genotyping quality control and SNP  
3 genotype calls were conducted using GenomeStudio (Illumina, San Diego, CA). Initial quality  
4 control filters included the removal of samples with a call rate <98% and SNPs with a call rate  
5 <95%, HWE <0.0001, and MAF < 5%. SNPs on chromosome 10 identified in the GRaD  
6 discovery analysis that were not genotyped were imputed with genipe—an automated genome-  
7 wide imputation pipeline that executes PLINK 1.07 [7], SHAPEIT [17], and IMPUTE2 [18] for  
8 data imputation to the 1000 Genomes Project, Phase 3 reference [19 20]. All imputed SNPs had  
9 an info score (IMPUTE2 imputation quality metric) greater than 0.9, indicating that all  
10 replication SNPs were imputed with high confidence.

11 The sample of twins and siblings available for this study comprised 749 participants in  
12 total, mean age 11.7 years, age range 8–19, from 343 unrelated twinships/sibships (Table S1).  
13 For the present study, only participants of European descent were analyzed and one child per  
14 twinship/sibship were randomly selected for analysis based on the availability of RAN and  
15 genetic data. The total sample size for replication analysis was 318 unrelated individuals.

16 Multivariate genetic analysis jointly analyzing RAN Colors, RAN Pictures, RAN Letters,  
17 and RAN Numbers standard scores for association at SNPs identified in the GRaD discovery  
18 analyses was conducted using MultiPhen while covarying for the effects of age, sex, and the first  
19 genome-wide PC calculated using EIGENSTRAT to correct for population stratification (Figure  
20 S2D).

## 21 **Bioinformatic Analysis**

22 All analyses were conducted using positions mapping to genome build GRCh37/hg19.



1           GenoSkyline is an unsupervised learning framework that predicts tissue-specific  
2   functionality in non-coding regions of the genome by integrating genome-wide epigenetic data  
3   from the Roadmap Epigenomics Project and ENCODE [21-23]. Detailed description of tissue  
4   specific functionality has been previously described [21]. Briefly, GenoSkyline uses an  
5   unsupervised-learning technique that evaluates the presence of well characterized DNase 1  
6   hypersensitivity sites and histone marks (H3k4me1, H3k4me3, H3k36me3, H3k27me3,  
7   H3k9me3, H3k27ac, H3k9ac) and calculates a posterior probability score (GS score) that a given  
8   genetic coordinate is functional. A GS score of “1” suggests that the genomic region of interest is  
9   functional within the given tissue type, while a score of “0” suggests no functional significance.  
10   Pre-calculated, genome-wide, tissue-specific GS scores for whole brain and sub-regions of the  
11   brain (angular gyrus, prefrontal cortex, cingulate gyrus, anterior caudate, hippocampus, inferior  
12   temporal gyrus, and substantia nigra) were obtained from the GenoSkyline database.

13           Follow-up analysis of epigenetic data from the Roadmap Epigenomics Project was  
14   conducted to identify predicted chromatin state in a genomic region of interest across specific  
15   tissue types. We evaluated the 18-state model previously generated by the Roadmap  
16   Epigenomics Project. Briefly, a model was derived from a multivariate hidden Markov model  
17   that considers the combinatorial interactions of 6 histone marks (H3K4me3, H3K4me1,  
18   H3K36me3, H3K27me3, H3K9me3, and H3K27ac) across 127 epigenomes and predicts the  
19   chromatin state within a genomic region within 18 different classifications [22]. Brain specific  
20   regions sampled were angular gyrus, prefrontal cortex, cingulate gyrus, anterior caudate,  
21   hippocampus, inferior temporal gyrus, and substantia nigra. Data were visualized using the  
22   Washington University in St. Louis (WashU) EpiGenome Browser v.42.

1 Linkage disequilibrium (LD) blocks were calculated using confidence intervals for CEU,  
2 AMR and YRI populations in 1000 Genomes Project Phase 3 [20 24]. SNPs with MAF < 0.1  
3 were removed prior to calculation of LD blocks. D' values were extracted using the web program  
4 LDlink.

5 The 3D genome browser was used to visualize publicly available chromatin contact maps  
6 at 10 kb resolution from adult hippocampal tissue [25-27].

## 7 **Neuroimaging Genetic Analysis**

### 8 **Pediatric, Imaging, Neurocognition, and Genetics (PING) Study**

9 Neuroimaging genetics analysis of volumes of cortical ROIs was conducted in the PING  
10 sample. Methods related to recruitment, ascertainment, data collection (neuroimaging,  
11 neurocognitive, genetic), and data processing are described in detail elsewhere [28]. Briefly, the  
12 PING study is a cross sectional sample of typically developing children ranging in age from 3-20  
13 years old (Table S1). Individuals were excluded from participating if they had a history of major  
14 developmental, psychiatric, or neurological disorders, brain injury, prematurity (i.e., born at less  
15 than 36 weeks gestational age), prenatal exposure to illicit drugs or alcohol, history of head  
16 trauma, or other medical conditions that could affect development. Subjects with learning  
17 disability or ADHD were not excluded. All experimental procedures and written informed  
18 consent forms were approved by the institutional review boards (IRB) at each of the 10  
19 participating PING study recruitment sites (University of California at San Diego, University of  
20 Hawaii, University of California at Los Angeles, Children's Hospital of Los Angeles of the  
21 University of Southern California, University of California at Davis, Kennedy Krieger Institute  
22 of Johns Hopkins University, Sackler Institute of Weill Cornell Medical College, University of

1 Massachusetts, Massachusetts General Hospital at Harvard University, and Yale University).  
2 Parental informed consent was obtained for participants less than 18 years of age with child  
3 assent (ages 7-17). For individuals 18 years of age and older, written informed consent was  
4 obtained.

5 DNA was extracted from saliva and genotyped on the Illumina Human660W Quad  
6 BeadChip (655,214 SNPs) for 1391 subjects in the PING study. Initial genotyping quality  
7 control and SNP genotype calls was conducted using GenomeStudio (Illumina, San Diego, CA)  
8 by the PING genomics core at the Scripps Translational Science Institute (La Jolla, CA). Initial  
9 quality control filters included the removal of samples with a call rate <98% and SNPs with a  
10 call rate <95%, HWE <0.0001, and MAF < 5%.

11 In depth descriptions of methods for neuroimaging data acquisition and processing for the  
12 PING study are described elsewhere [28]. Briefly, structural MRI data were collected from all  
13 individuals using a standardized multiple-modality high-resolution structural MRI protocol  
14 involving 3D T1-weighted volumes across sites to maintain consistency across data collection.  
15 Image files in DICOM format were processed by the neuroimaging post-processing core at the  
16 University of California at San Diego using an automated processing stream written in  
17 MATLAB and C++. Cortical surface reconstruction and subcortical segmentation were  
18 performed using a fully automated set of tools available in the Freesurfer software suite. Cortical  
19 parcellation of sulci and gyri were automatically defined using the Desikan-Killiany Atlas  
20 integrated within the FreeSurfer suite [29]. All data (genetic and neuroanatomical) were obtained  
21 from the PING portal.

## 22 **Cortical volume regions of interest selection and statistical analysis**

1 Left and right hemisphere cortical regions spanning the inferior frontal gyrus,  
2 temporoparietal region, and occipitotemporal area were selected for candidate region of interest  
3 analysis (Table S3). Left hemisphere structures spanning the inferior frontal gyrus,  
4 temporoparietal region, and occipitotemporal area comprise the canonical reading network, and  
5 show atypical patterns of functional activation in reading disabled children relative to typically  
6 developing children [30]. Respective right hemisphere regions were also included in the analysis  
7 since evidence suggests that naming speed is also associated with grey matter volume differences  
8 in right hemisphere frontal, temporoparietal and occipital regions [30 31]. Although  
9 hippocampus is not part of the canonical cortical reading network, the left and right hippocampus  
10 was included in the analysis to follow-up on tissue specific epigenetic and chromatin interaction  
11 findings in the present study.

12 Imaging genetics analysis was conducted on 690 subjects with complete phenotype and  
13 genotype data that passed both neuroimaging and genotype QC. All analyses were corrected for  
14 the effects of age, sex, handedness, scanner device [32], intracranial volume, highest parental  
15 education, family income, and the first four genome-wide PCs calculated using EIGENSTRAT  
16 to correct for population stratification (Figure S2E). The SNP rs1555839 was genotyped using  
17 the Illumina Human660W Quad BeadChip in the PING sample and used for neuroimaging  
18 genetics analysis. Cortical volumes across 16 ROIs were tested for association with rs1555839  
19 using linear regression under an additive genetic model in PLINK 1.9 [33].

20  
21  
22  
23  
24

## REFERENCES

1. Jacobson LA, Koriakin T, Lipkin P, et al. Executive Functions Contribute Uniquely to Reading Competence in Minority Youth. *J Learn Disabil* 2016 doi: 10.1177/0022219415618501[published Online First: Epub Date]].
2. Wolf M, Denkla MB. RAN/RAS: Rapid Automatized Naming and Rapid Alternating Stimulus Tests. Austin, TX: Pro-Ed, 2005.
3. Torgesen JK, Wagner RK, Rashotte CA. Test of Word Reading Efficiency. Austin, TX: PRO-ED, 1999.
4. Woodcock RW, McGrew KS, Mather N. Woodcock-Johnson® III Normative Update Complete. Boston, MA: Houghton Mifflin Harcourt, 2001.
5. Thornton T, Tang H, Hoffmann TJ, et al. Estimating kinship in admixed populations. *Am J Hum Genet* 2012;**91**(1):122-38 doi: 10.1016/j.ajhg.2012.05.024[published Online First: Epub Date]].
6. Price AL, Patterson NJ, Plenge RM, et al. Principal components analysis corrects for stratification in genome-wide association studies. *Nat Genet* 2006;**38**(8):904-9 doi: 10.1038/ng1847[published Online First: Epub Date]].
7. Purcell S, Neale B, Todd-Brown K, et al. PLINK: a tool set for whole-genome association and population-based linkage analyses. *Am J Hum Genet* 2007;**81**(3):559-75 doi: 10.1086/519795[published Online First: Epub Date]].
8. O'Reilly PF, Hoggart CJ, Pomyen Y, et al. MultiPhen: Joint Model of Multiple Phenotypes Can Increase Discovery in GWAS. *PLOS ONE* 2012;**7**(5):e34861 doi: 10.1371/journal.pone.0034861[published Online First: Epub Date]].
9. Todd DL, Timothy AB.
10. Brown TA, Moore MT. Confirmatory factor analysis. *Handbook of structural equation modeling*. New York, NY, US: Guilford Press, 2012:361-79.
11. Muthén LK, Muthén BO. *Mplus User's Guide*, Eighth Edition. Los Angeles, CA: Muthén & Muthén, 1998-2017.
12. Willer CJ, Li Y, Abecasis GR. METAL: fast and efficient meta-analysis of genomewide association scans. *Bioinformatics* 2010;**26**(17):2190-1 doi: 10.1093/bioinformatics/btq340[published Online First: Epub Date]].
13. Gialluisi A, Newbury DF, Wilcutt EG, et al. Genome-wide screening for DNA variants associated with reading and language traits. *Genes Brain Behav* 2014;**13**(7):686-701 doi: 10.1111/gbb.12158[published Online First: Epub Date]].
14. DeFries JC, Filipek PA, Fulker DW, et al. Colorado Learning Disabilities Research Center. *Learning Disabilities: A Multidisciplinary Journal* 1997;**8**:7-19
15. Willcutt EG, Pennington BF, Olson RK, et al. Neuropsychological analyses of comorbidity between reading disability and attention deficit hyperactivity disorder: in search of the common deficit. *Developmental Neuropsychology* 2005;**27**(1):35-78 doi: 10.1207/s15326942dn2701\_3[published Online First: Epub Date]].
16. Compton DL, Olson RK, DeFries JC, et al. Comparing the Relationships Among Two Different Versions of Alphanumeric Rapid Automatized Naming and Word Level Reading Skills. *Scientific Studies of Reading* 2002;**6**(4):343-68
17. Delaneau O, Zagury JF, Marchini J. Improved whole-chromosome phasing for disease and population genetic studies. *Nat Methods* 2013;**10**(1):5-6 doi: 10.1038/nmeth.2307[published Online First: Epub Date]].

- 1 18. Marchini J, Howie B. Genotype imputation for genome-wide association studies. *Nat Rev*  
2 *Genet* 2010;**11**(7):499-511 doi: 10.1038/nrg2796[published Online First: Epub Date]].
- 3 19. Perreault L-PL, Legault M-A, Asselin G, et al. genipe: An automated genome-wide  
4 imputation pipeline with automatic reporting and statistical tools. *Bioinformatics* 2016
- 5 20. Genomes Project C, Auton A, Brooks LD, et al. A global reference for human genetic  
6 variation. *Nature* 2015;**526**(7571):68-74 doi: 10.1038/nature15393[published Online  
7 First: Epub Date]].
- 8 21. Lu Q, Powles RL, Wang Q, et al. Integrative Tissue-Specific Functional Annotations in the  
9 Human Genome Provide Novel Insights on Many Complex Traits and Improve Signal  
10 Prioritization in Genome Wide Association Studies. *PLOS Genetics*  
11 2016;**12**(4):e1005947 doi: 10.1371/journal.pgen.1005947[published Online First: Epub  
12 Date]].
- 13 22. Roadmap Epigenomics Consortium. Integrative analysis of 111 reference human  
14 epigenomes. *Nature* 2015;**518**(7539):317-30 doi: 10.1038/nature14248[published Online  
15 First: Epub Date]].
- 16 23. ENCODE Project Consortium. An integrated encyclopedia of DNA elements in the human  
17 genome. *Nature* 2012;**489**(7414):57-74 doi: 10.1038/nature11247[published Online First:  
18 Epub Date]].
- 19 24. Gabriel SB, Schaffner SF, Nguyen H, et al. The structure of haplotype blocks in the human  
20 genome. *Science* 2002;**296**(5576):2225-29 doi: 10.1126/science.1069424[published  
21 Online First: Epub Date]].
- 22 25. Wang Y, Zhang B, Zhang L, et al. The 3D Genome Browser: a web-based browser for  
23 visualizing 3D genome organization and long-range chromatin interactions. *bioRxiv* 2017
- 24 26. Zhang Y, An L, Xu J, et al. Enhancing Hi-C data resolution with deep convolutional neural  
25 network HiCPlus. *Nature Communications* 2018;**9**:750 doi: 10.1038/s41467-018-03113-  
26 2[published Online First: Epub Date]].
- 27 27. Schmitt AD, Hu M, Jung I, et al. A Compendium of Chromatin Contact Maps Reveal  
28 Spatially Active Regions in the Human Genome. *Cell reports* 2016;**17**(8):2042-59 doi:  
29 10.1016/j.celrep.2016.10.061[published Online First: Epub Date]].
- 30 28. Jernigan TL, Brown TT, Hagler DJ, Jr., et al. The Pediatric Imaging, Neurocognition, and  
31 Genetics (PING) Data Repository. *Neuroimage* 2016;**124**(Pt B):1149-54 doi:  
32 10.1016/j.neuroimage.2015.04.057[published Online First: Epub Date]].
- 33 29. Desikan RS, Segonne F, Fischl B, et al. An automated labeling system for subdividing the  
34 human cerebral cortex on MRI scans into gyral based regions of interest. *Neuroimage*  
35 2006;**31**(3):968-80 doi: 10.1016/j.neuroimage.2006.01.021[published Online First: Epub  
36 Date]].
- 37 30. Norton ES, Beach SD, Gabrieli JD. Neurobiology of dyslexia. *Curr Opin Neurobiol*  
38 2015;**30**:73-8 doi: 10.1016/j.conb.2014.09.007[published Online First: Epub Date]].
- 39 31. Norton ES, Wolf M. Rapid automatized naming (RAN) and reading fluency: implications for  
40 understanding and treatment of reading disabilities. *Annu Rev Psychol* 2012;**63**:427-52  
41 doi: 10.1146/annurev-psych-120710-100431[published Online First: Epub Date]].
- 42 32. Mehta CM, Gruen JR, Zhang H. A method for integrating neuroimaging into genetic models  
43 of learning performance. *Genet Epidemiol* 2017;**41**(1):4-17 doi:  
44 10.1002/gepi.22025[published Online First: Epub Date]].

- 1 33. Chang CC, Chow CC, Tellier LCAM, et al. Second-generation PLINK: rising to the
- 2 challenge of larger and richer datasets. *GigaScience* 2015;4(1):7 doi: 10.1186/s13742-
- 3 015-0047-8[published Online First: Epub Date]].

**Figure S1: Results of principal components analysis (PCA) depicting the first 10 PCs plotted against one another in the full GRaD sample.** Visual inspection of PC plots 1-3 reflect population structure, while PC 4-10 do not. Light grey dots = self-reported African American ethnicity; Dark grey dots = self-reported Hispanic American ethnicity; Black dots = self-reported Hispanic American and African American ethnicity.

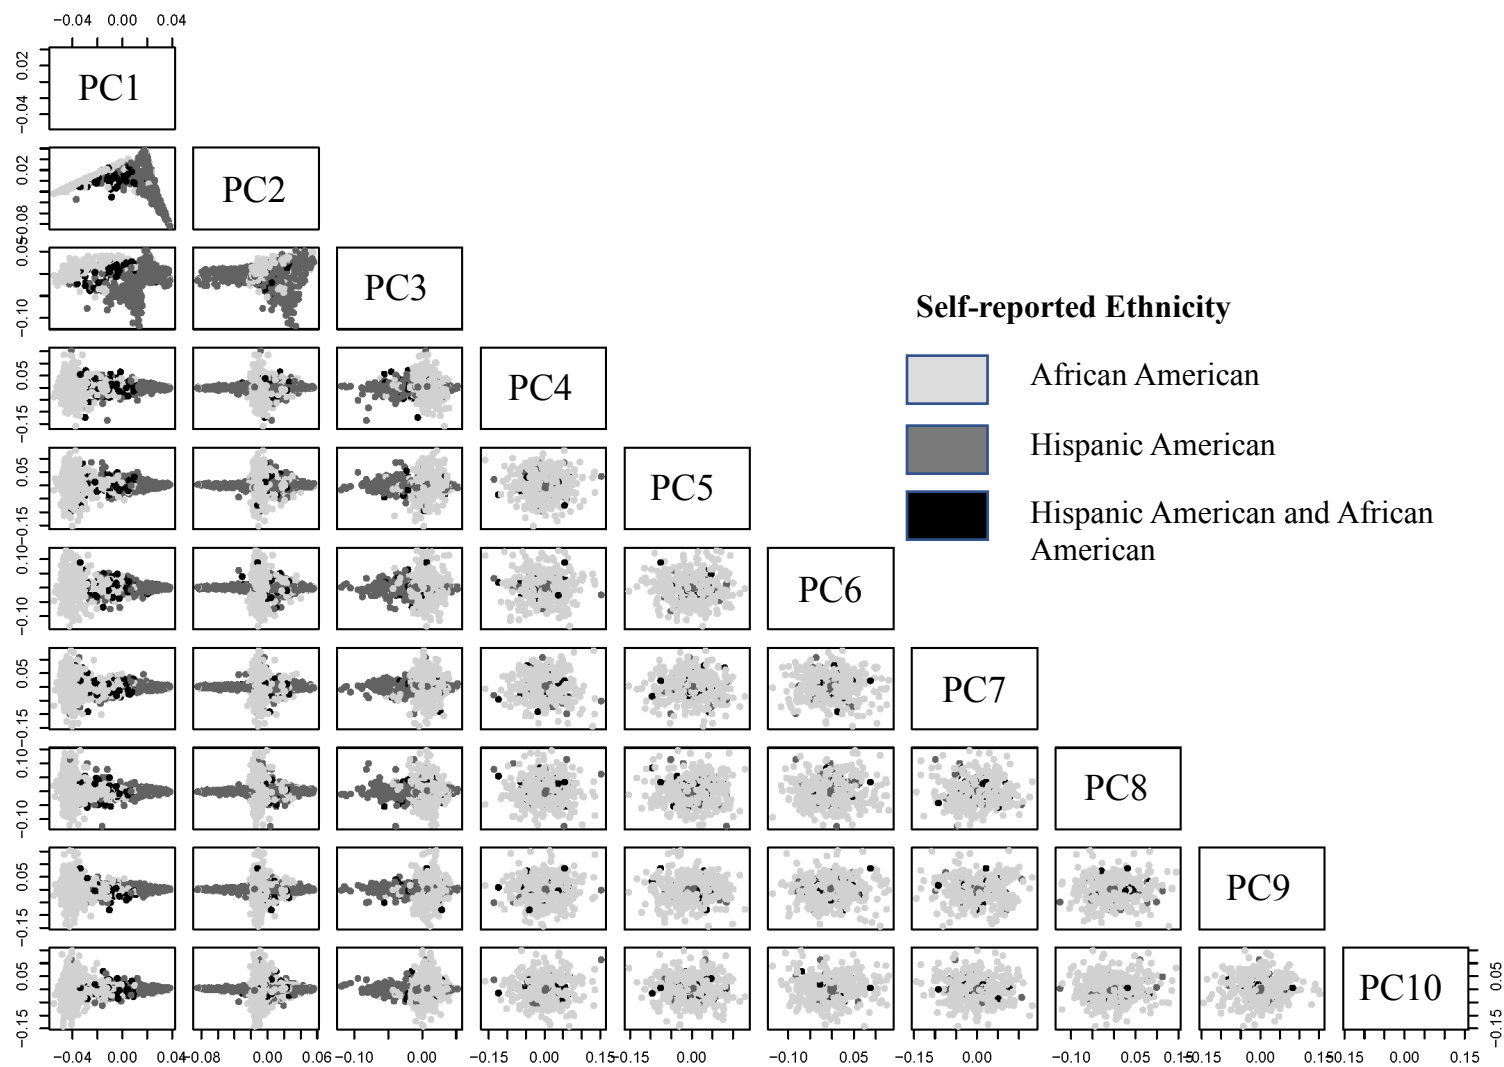



**Figure S2: Scree plots depicting cumulative variance explained with each additional consecutive principal component (PC) for A) the full GRaD sample, B) Hispanic American cluster subset of GRaD, C) African American cluster subset of GRaD, D) CLDRC, and E) PING. A bend in the plot represents the point at which each additional PC contributes to incremental gains in variance explained. PCs located to the left of the bend, plus one, are included in the final statistical models as covariates to correct for population stratification. For example, in the GRaD sample, the first three PCs, accounting for 6.6% of the variance, are used as covariates in the final models to correct for population stratification.**

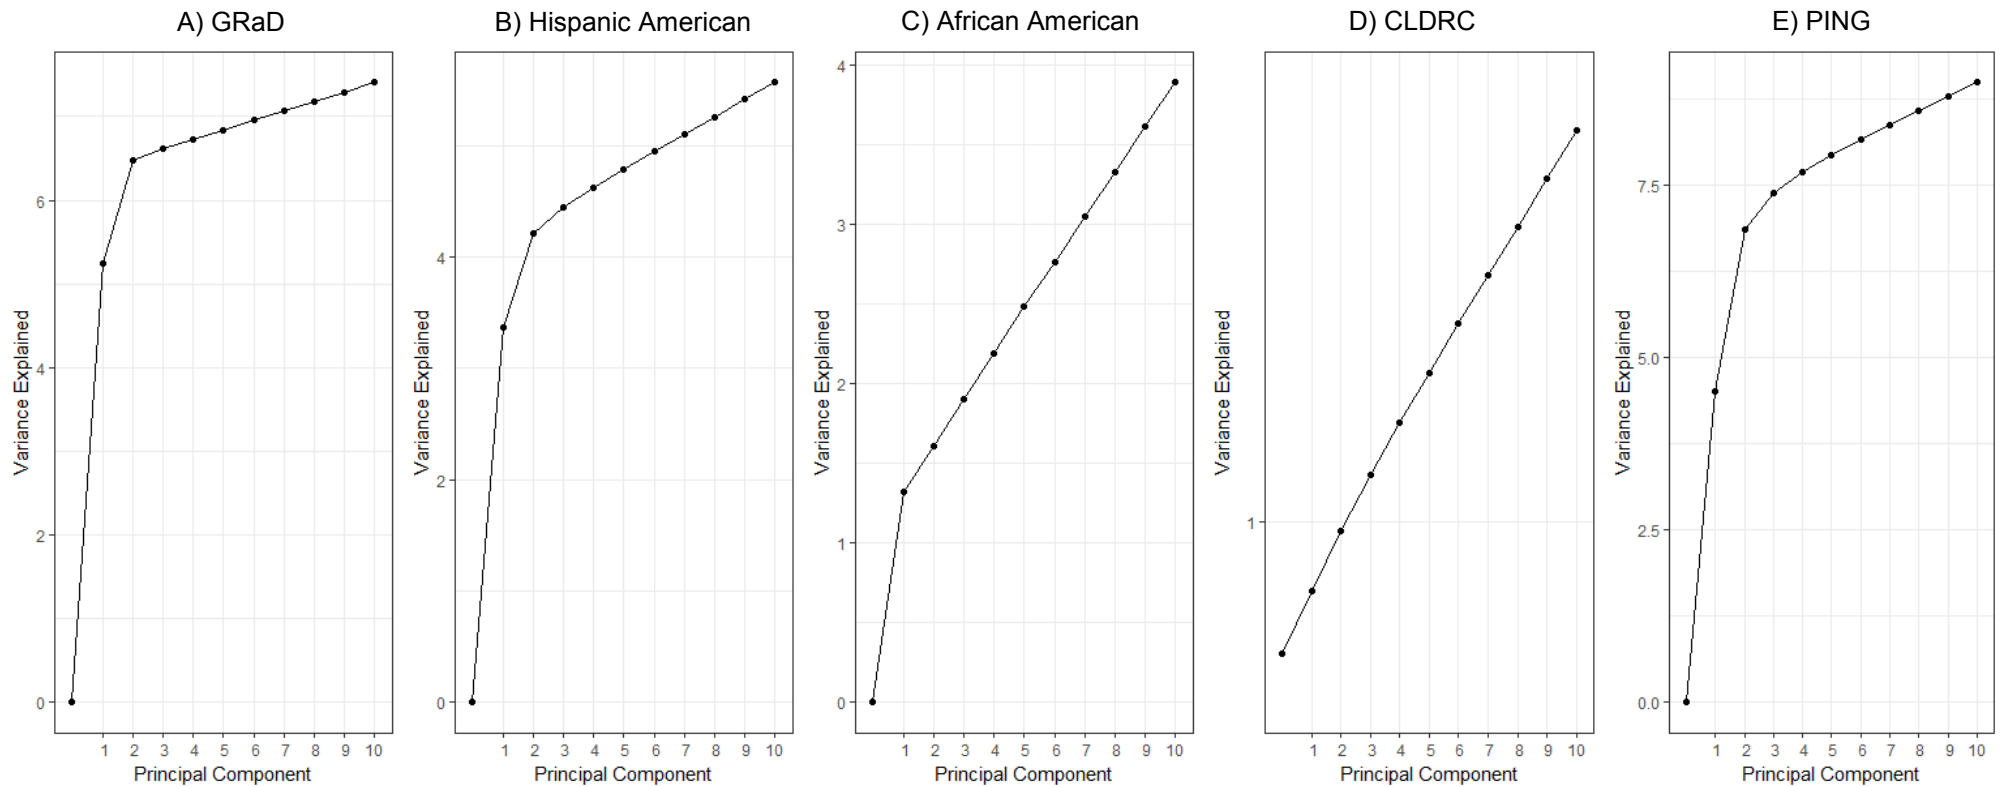

**Figure S3: Results of PCA with PC projection of AMR and ASW reference populations on the full GRaD sample with K-means clustering using two centroids. PC1 plotted against PC2. GRaD subjects clustering with the majority of AMR reference samples were identified as Hispanic American, while GRaD subjects clustering with the majority of ASW reference samples were identified as African American. With K-means clustering, there was 82.4% correspondence between self-reported African Americans in GRaD and cluster identification with the ASW reference population. For self-reported Hispanic Americans in GRaD, there was 95.9% correspondence with AMR cluster identification**

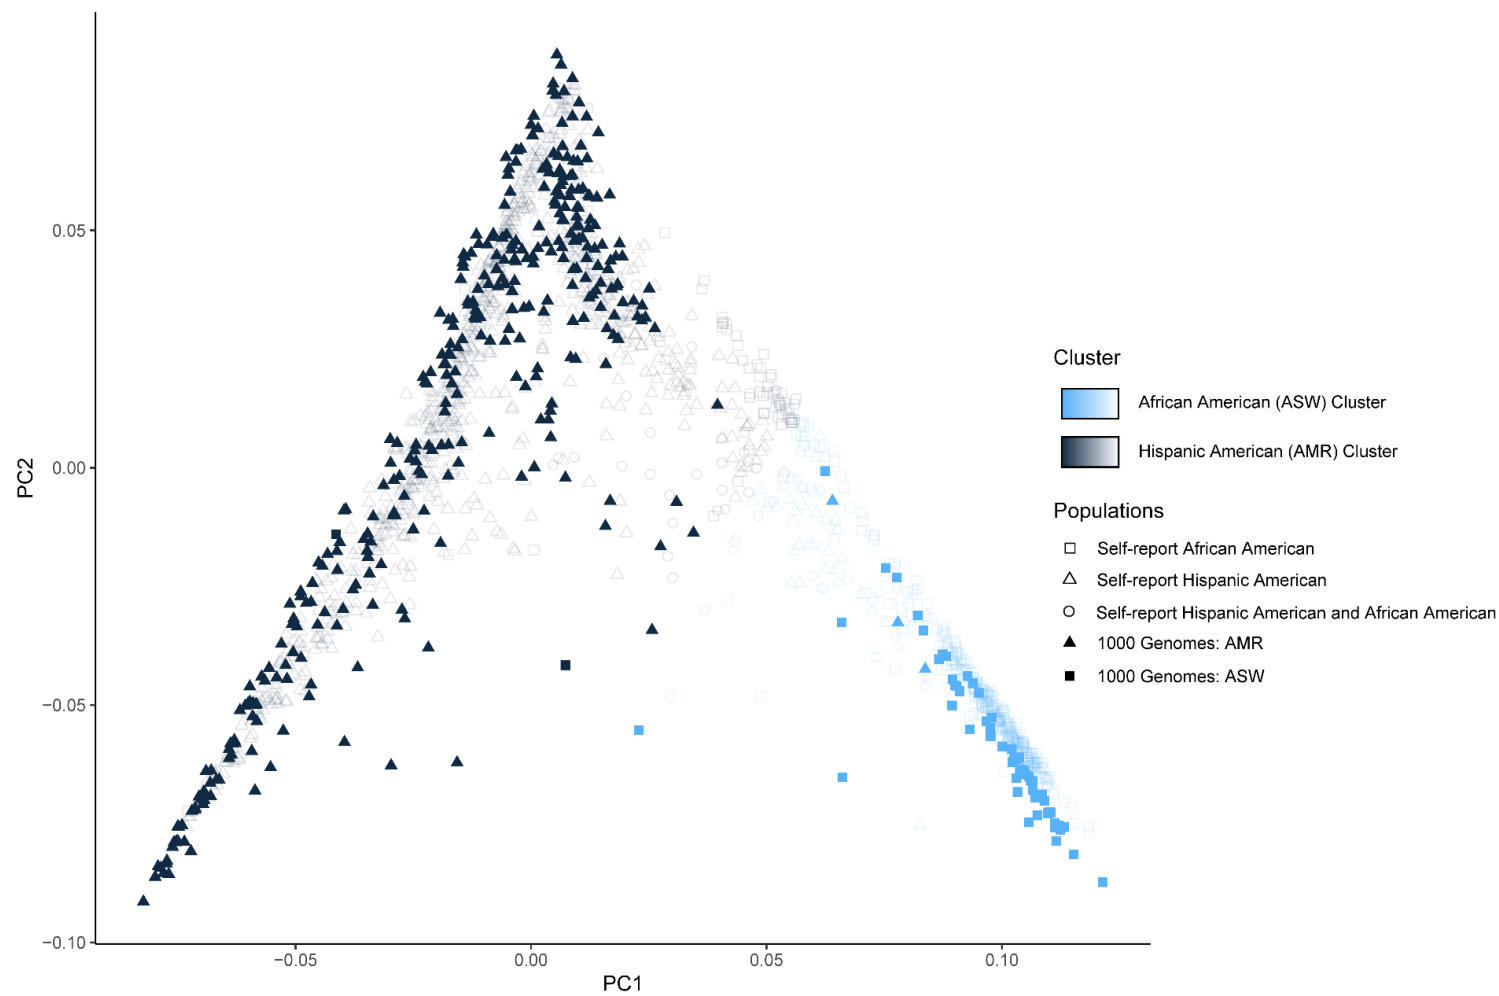

**Figure S4: Q-Q plot showing expected distribution of test statistics over observed for the multivariate GWAS analysis in the GRaD sample.**

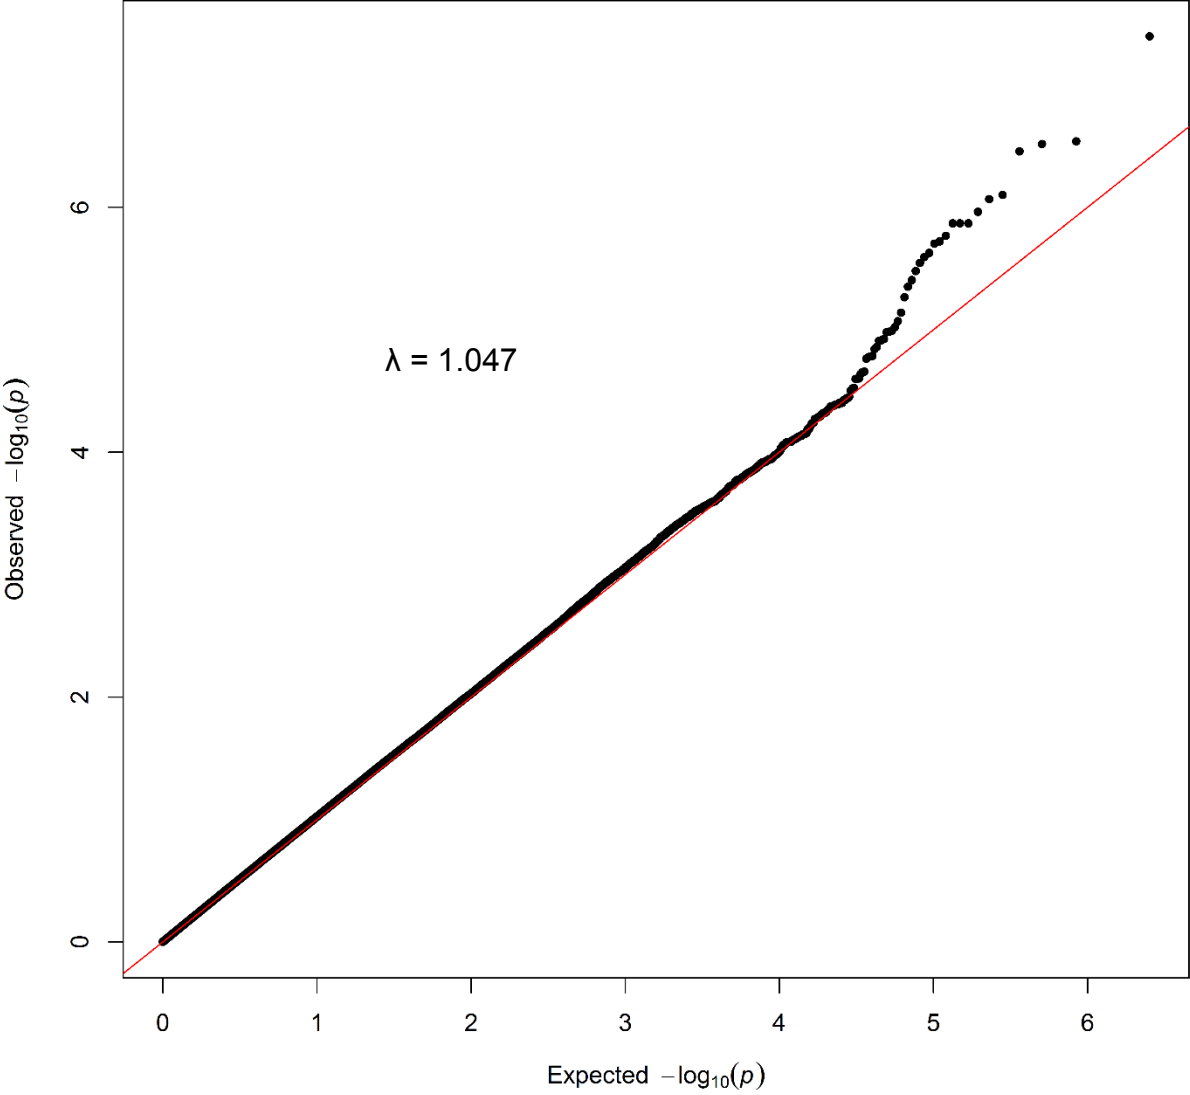

Figure S5: A) Manhattan and B) Q-Q plots summarizing results from univariate GWAS of RAN Objects.

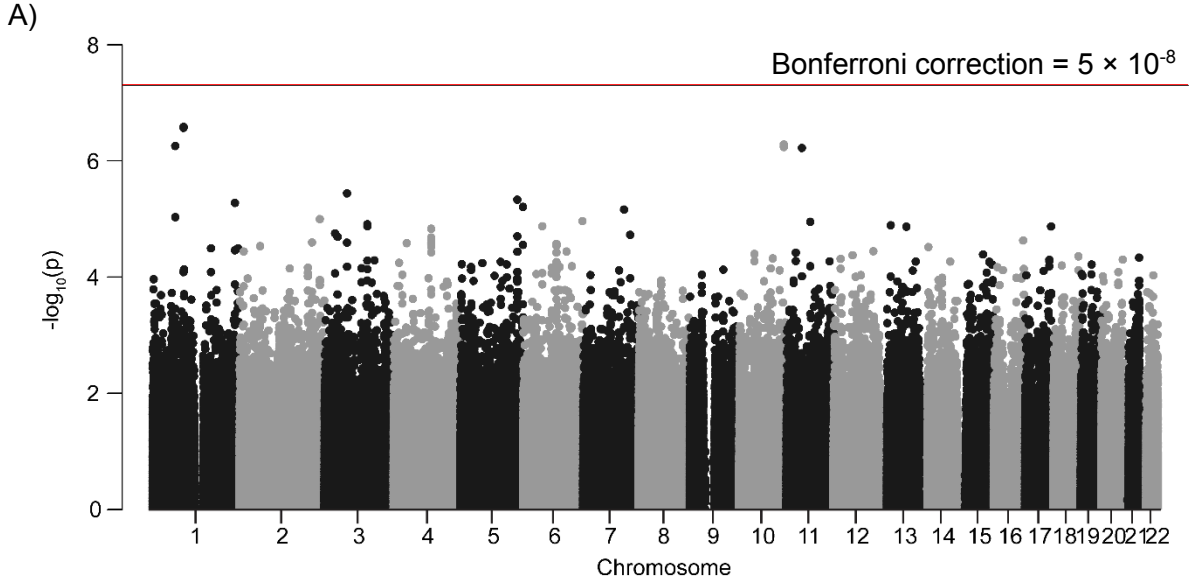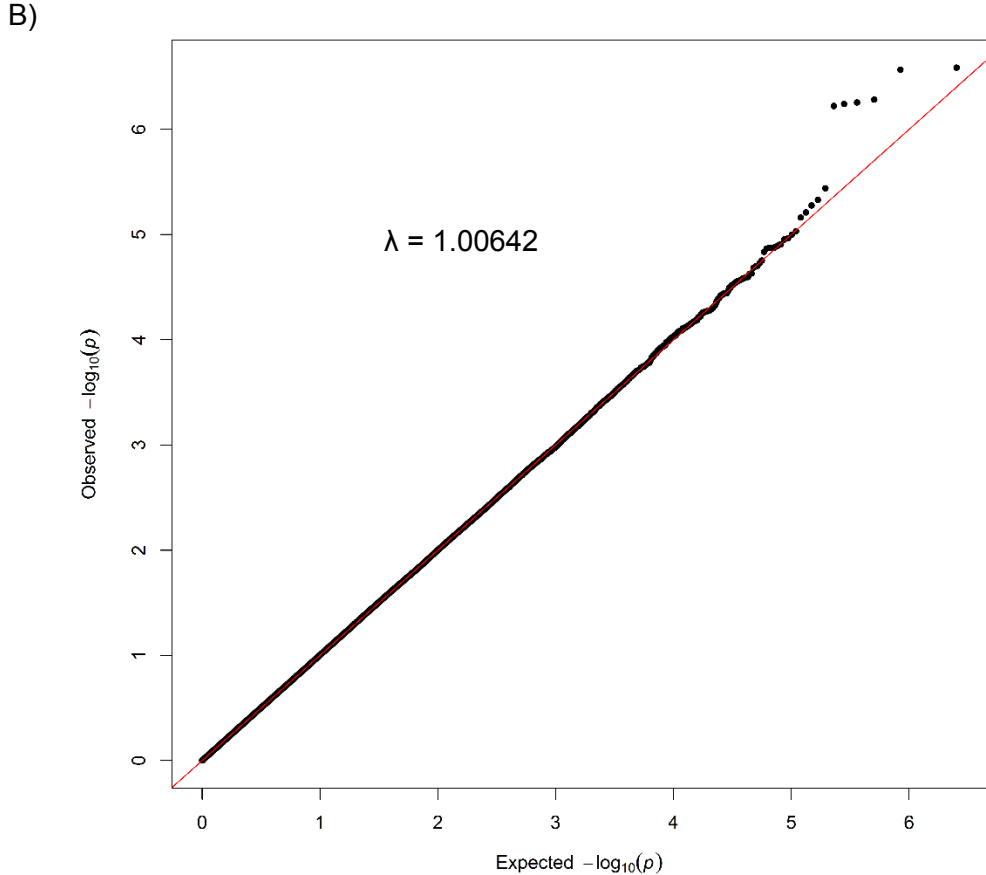

**Figure S6: A) Manhattan and B) Q-Q plots summarizing results from univariate GWAS of RAN Letters**

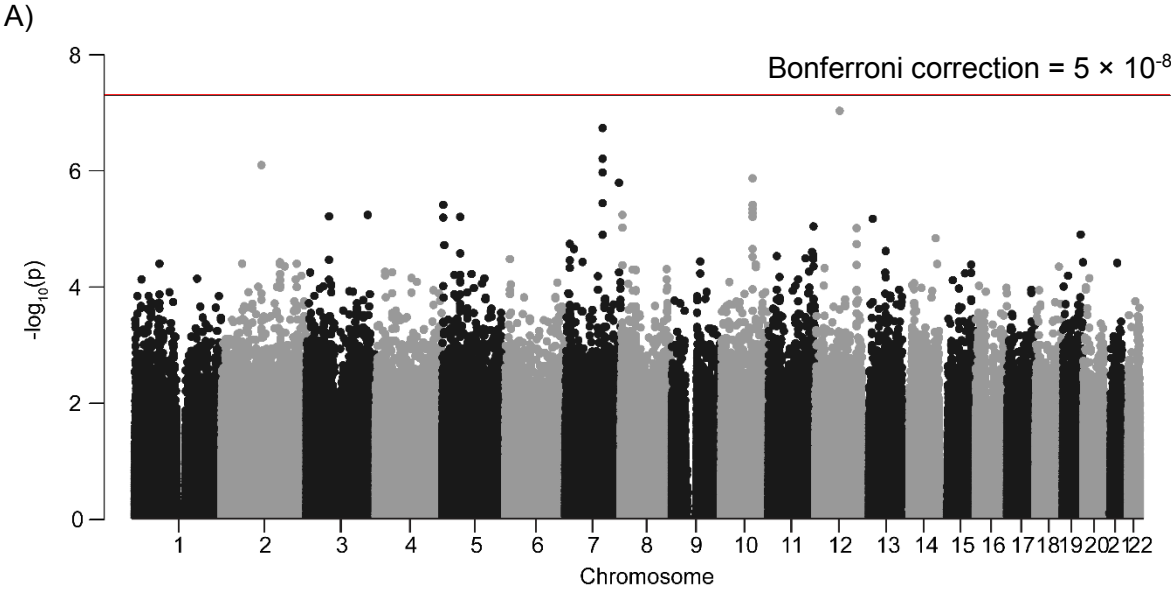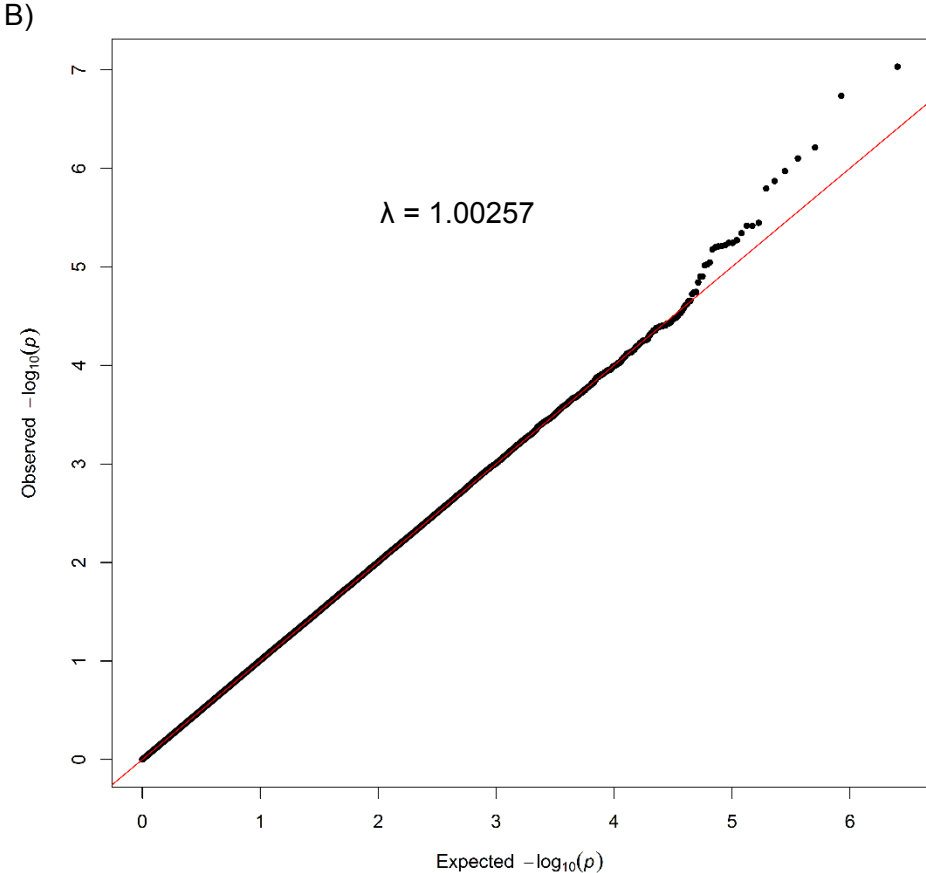

Figure S7: A) Manhattan and B) Q-Q plots summarizing results from univariate GWAS of RAS Letters/Numbers

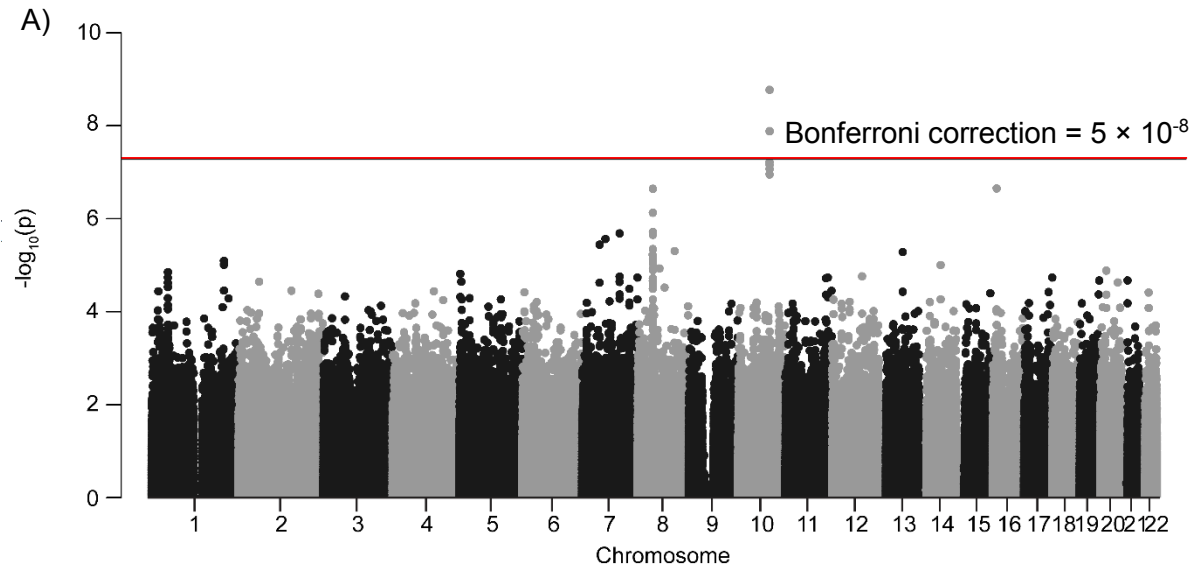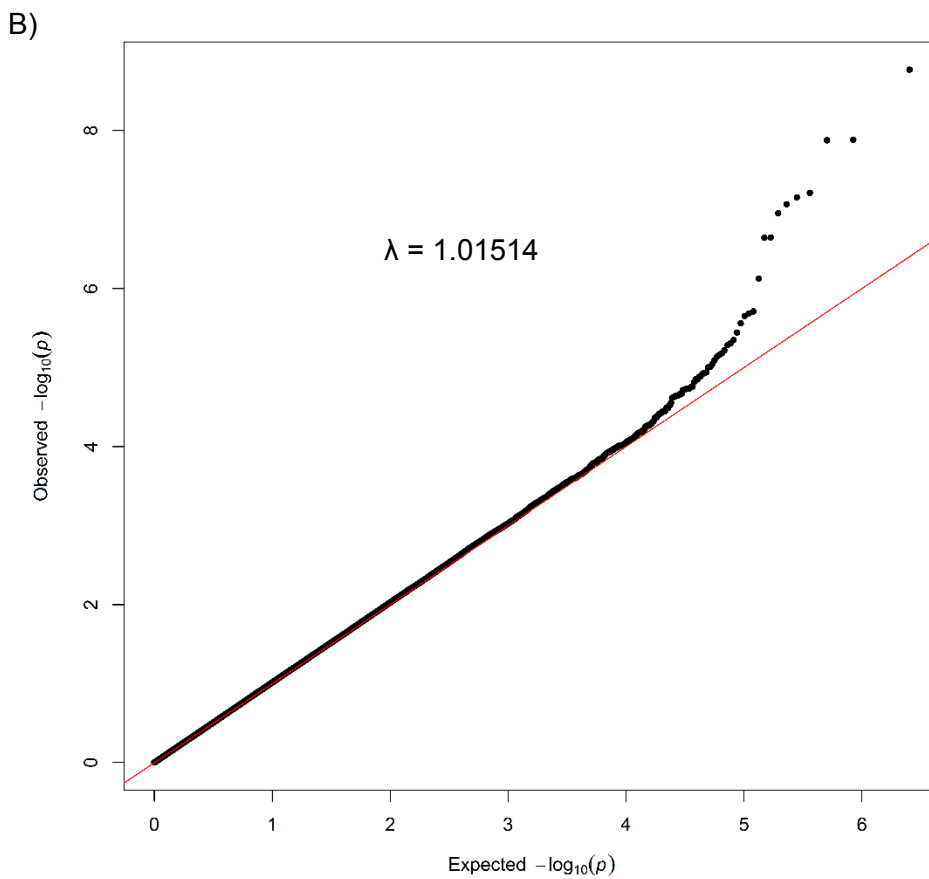

**Figure S8: A) Manhattan and B) Q-Q plots summarizing results from meta-analysis of a latent naming speed variable in GRaD.**

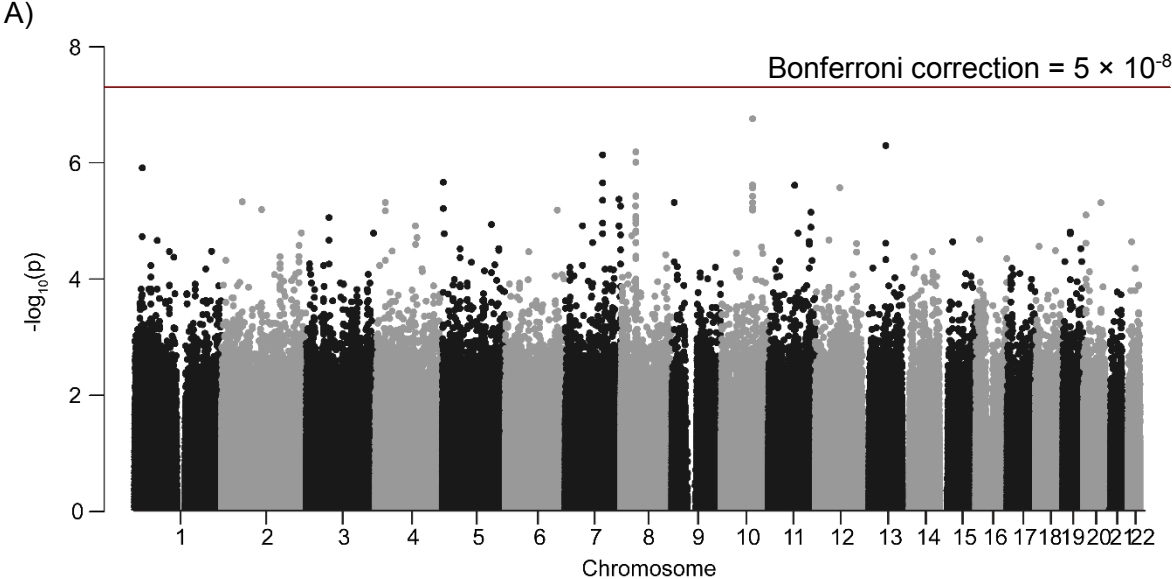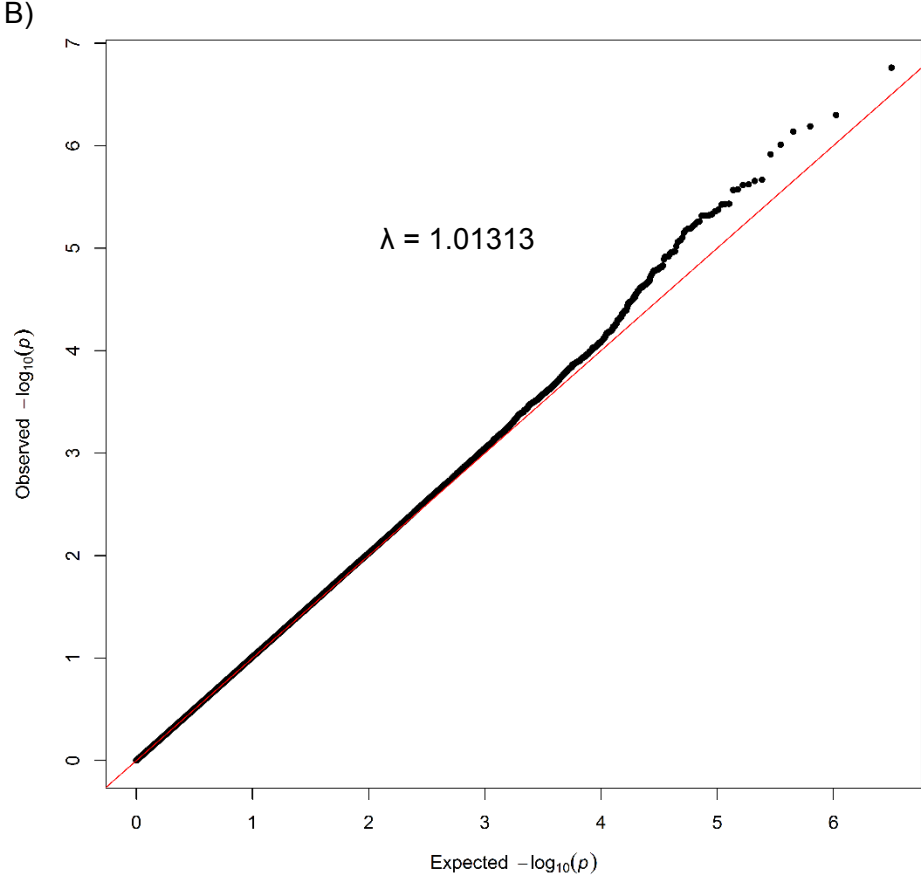

**Figure S9: Pre-calculated GS scores (blue) from GenoSkyline for whole brain, angular gyrus, prefrontal cortex, cingulate gyrus, anterior caudate, hippocampus, inferior temporal gyrus, and substantia nigra. A GS score of “1” suggests that the genomic region of interest is functional within the given tissue type, while a score of “0” suggests no functional significance.**

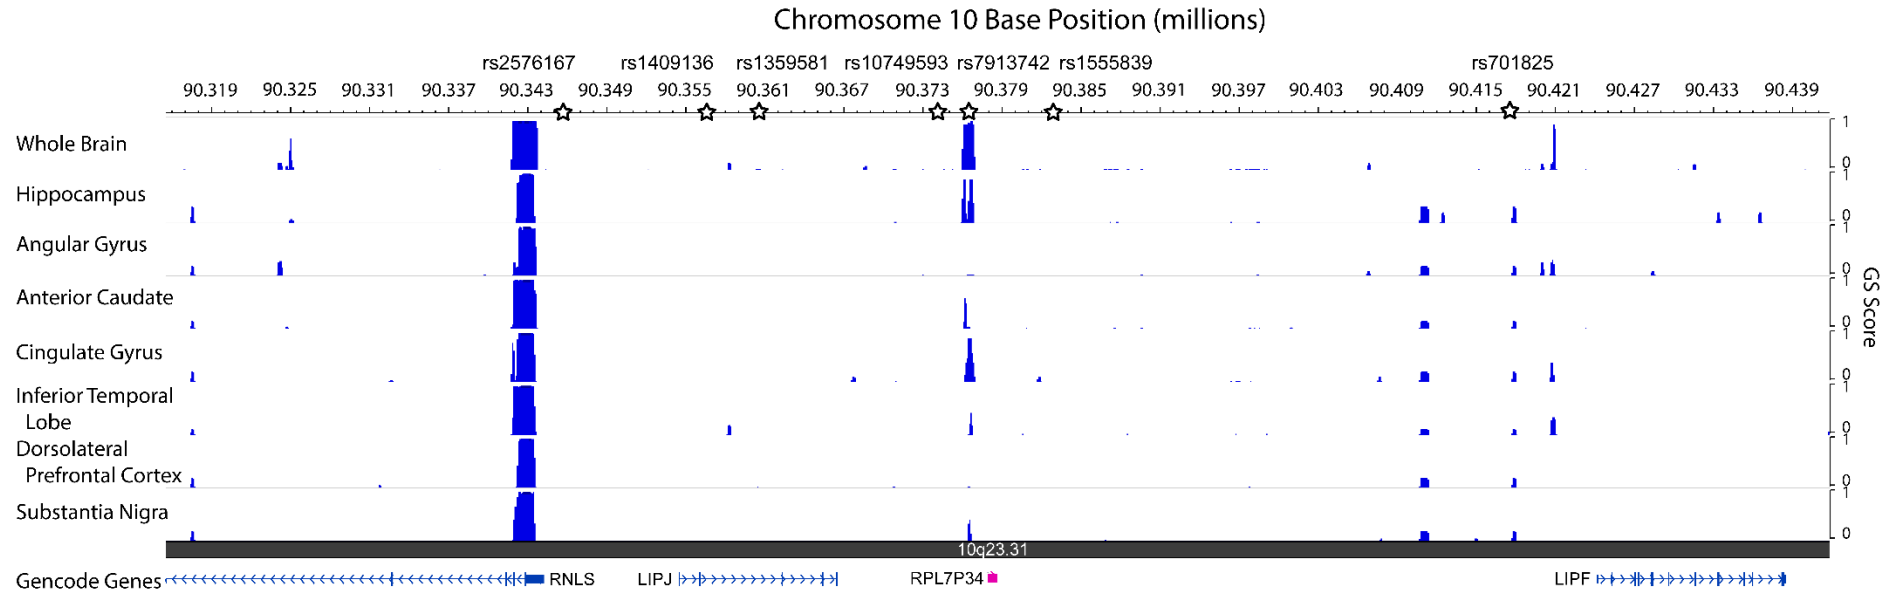



**Table S1: Demographic information for GRaD, CLDRC, and PING samples**

|       | <b>Self-Reported Ancestry</b>                 | <b>Child's Age in Years, range (mean)</b> | <b>Sex Male:Female</b> | <b>Sample Size</b> |
|-------|-----------------------------------------------|-------------------------------------------|------------------------|--------------------|
| GRaD  | Hispanic American                             | 7.8-15.9 (11.3)                           | 379:433                | 812                |
|       | African American                              | 8-15.8 (11.5)                             | 212:233                | 445                |
|       | Hispanic and African American                 | 8.1-15.8 (12.1)                           | 33:34                  | 67                 |
|       | Total                                         | 7.8-15.9 (11.4)                           | 624:700                | 1324               |
| CLDRC | European                                      | 8-19 (11.6)                               | 165:153                | 318                |
| PING  | <sup>a</sup> White                            | 3.7-20.8 (12.1)                           | 241:226                | 467                |
|       | <sup>a</sup> African American or Black        | 3.5-20.8 (13.2)                           | 56:40                  | 96                 |
|       | <sup>a</sup> American Indian or Alaska Native | 3.7-20.8 (12.1)                           | 5:0                    | 5                  |
|       | <sup>a</sup> Asian                            | 3.6-21 (14.5)                             | 16:48                  | 64                 |
|       | Report More Than One                          | 3.5-20.9 (11.8)                           | 25:33                  | 58                 |
|       | Total                                         | 3.5-21 (12.4)                             | 343:347                | 690                |

<sup>a</sup>US census category

**Table S2: GRaD Assessments Descriptives:** Descriptive statistics for assessments evaluated in the GRaD sample. Means reflect the z-score (mean = 0, standard deviation (SD) = 1) of the population standard score (mean = 100, SD = 15) available for each psychometric analysis.

|                             | <b>Mean (SD)</b> | <b>Skew</b> | <b>Kurtosis</b> |
|-----------------------------|------------------|-------------|-----------------|
| <b>RanObjects</b>           | -0.198 (1.044)   | 0.341       | 0.055           |
| <b>RanLetters</b>           | 0.063 (0.938)    | 0.059       | -0.081          |
| <b>RasLettNum</b>           | 0.050 (0.943)    | -0.128      | -0.068          |
| <b>TOWRE</b>                | -0.489 (1.118)   | 0.019       | -0.200          |
| <b>WJ-III Basic Reading</b> | -0.365 (0.924)   | -0.473      | 1.279           |

**Table S3: Cortical regions of interest associated with reading ability and disability**

|                               |                                                         |
|-------------------------------|---------------------------------------------------------|
| <b>Inferior Frontal Gyrus</b> | Pars Opercularis<br>Pars Orbitalis<br>Pars Triangularis |
| <b>Temporo-parietal</b>       | Supramarginal Gyrus<br>Inferior Parietal Cortex         |
| <b>Occipito-temporal</b>      | Inferior Temporal Gyrus<br>Fusiform Gyrus               |

**Table S4: Pearson correlation coefficients across RAN Objects, RAN Letters, RAS Letters/Numbers, Test of Word Reading Efficiency (TOWRE), and Woodcock-Johnson Basic Reading (WJ-III Basic Reading).**

|                             | <b>RAN Objects</b> | <b>RAN Letters</b> | <b>RAS Letters/Numbers</b> | <b>TOWRE</b> | <b>WJ-III Basic Reading</b> |
|-----------------------------|--------------------|--------------------|----------------------------|--------------|-----------------------------|
| <b>RAN Objects</b>          | 1                  | 0.621**            | 0.624**                    | 0.413**      | 0.325**                     |
| <b>RAN Letters</b>          |                    | 1                  | 0.781**                    | 0.547**      | 0.464**                     |
| <b>RAS Letters/Numbers</b>  |                    |                    | 1                          | 0.578**      | 0.488**                     |
| <b>TOWRE</b>                |                    |                    |                            | 1            | 0.846**                     |
| <b>WJ-III Basic Reading</b> |                    |                    |                            |              | 1                           |

\*\*p < 1 × 10<sup>-32</sup> (two-tailed)

**Table S5: Meta-analysis results on latent naming speed variable derived from RAN and RAS performance in GRaD.**

| <b>MARKER</b> | <b>CHR</b> | <b>BP</b> | <b>Minor Allele</b> | <b>Z-score</b> | <b>P-value</b>        | <b>Direction</b> | <b>HetISq</b> | <b>HetPVal</b>        | <b>GENE</b>    |
|---------------|------------|-----------|---------------------|----------------|-----------------------|------------------|---------------|-----------------------|----------------|
| rs1555839     | 10         | 90382820  | C                   | 5.225          | $1.74 \times 10^{-7}$ | ++               | 31.1          | 0.228                 | <i>RPL7P34</i> |
| rs9540938     | 13         | 67441725  | A                   | -5.025         | $5.03 \times 10^{-7}$ | --               | 0             | 0.779                 | <i>PCDH9</i>   |
| rs8188533     | 8          | 43586240  | T                   | -4.976         | $6.48 \times 10^{-7}$ | --               | 0             | 0.580                 | --             |
| rs6963842     | 7          | 107634989 | G                   | 4.953          | $7.29 \times 10^{-7}$ | ++               | 63.1          | 0.099                 | <i>LAMB1</i>   |
| rs7463498     | 8          | 43447235  | G                   | 4.896          | $9.77 \times 10^{-7}$ | ++               | 59            | 0.118                 | --             |
| rs16870453    | 5          | 2795776   | T                   | 4.738          | $2.15 \times 10^{-6}$ | ++               | 0             | 0.943                 | --             |
| rs4320486     | 7          | 107643977 | T                   | 4.733          | $2.21 \times 10^{-6}$ | ++               | 73.2          | 0.053                 | <i>LAMB1</i>   |
| rs701825      | 10         | 90417547  | G                   | 4.718          | $2.39 \times 10^{-6}$ | ++               | 85.7          | $8.28 \times 10^{-3}$ | --             |
| rs11177505    | 12         | 69516642  | G                   | -4.694         | $2.68 \times 10^{-6}$ | --               | 54.4          | 0.139                 | --             |
| rs8175494     | 8          | 43621389  | C                   | 4.628          | $3.69 \times 10^{-6}$ | ++               | 0             | 0.401                 | --             |

Top 10 markers from a meta-analysis of ethnicity specific GWAS on a latent naming speed variable for RAN Objects, RAN Letters, and RAS Letters and Numbers in Hispanic American and African American participants in the GRaD study. Markers were assigned to genes if they fell within the canonical gene body as described by 1000 Genomes Project, Phase 3 (v80 GRCh37). CHR = chromosome, BP = Base Position, MAF = Minor Allele Frequency, Z-score = combined z-statistic, P-value = meta-analysis p-value, Direction = summary of effect direction for each sample, HetISq =  $I^2$  statistic which measures heterogeneity on scale of 0-100% across samples, HetPVal = P-value for heterogeneity statistic.

**Table S6: Univariate association analysis of RAN Letters in the CLDRC cohort displaying results from top markers identified in the GRaD multivariate GWAS and latent naming speed GWAS meta-analysis.**

| <b>MARKER</b> | <b>CHR</b> | <b>BP</b> | <b>Minor Allele</b> | <b>MAF</b> | <b>BETA</b> | <b>SE</b> | <b>STAT</b> | <b>P</b>                |
|---------------|------------|-----------|---------------------|------------|-------------|-----------|-------------|-------------------------|
| rs6963842     | 7          | 107634989 | T                   | 0.495      | 0.020       | 0.110     | 0.182       | 0.856                   |
| rs1555839     | 10         | 90382820  | C                   | 0.319      | -0.311      | 0.101     | -3.063      | $2.38 \times 10^{-3}$ * |
| rs701825      | 10         | 90417547  | G                   | 0.282      | -0.345      | 0.103     | -3.34       | $9.32 \times 10^{-4}$ * |

\*Survives Bonferroni correction for multiple testing ( $p < 0.0161$ )

**Table S7: Genetic coordinates for LD blocks within chr10:90325000-90427000**

| <b>1000 genomes population</b> | <b>Genetic Coordinates on Chromosome 10</b>                                                                                |
|--------------------------------|----------------------------------------------------------------------------------------------------------------------------|
| CEU                            | 90325770-90334313<br>90334338-90418065<br>90422136-90426612                                                                |
| AMR                            | 90325133-90339593<br>90340747-90341049<br>90343398-90418065<br>90422136-90426612                                           |
| YRI                            | 90327653-90329787<br>90331816-90334835<br>90340747-90341049<br>90342837-90381875<br>90386161-90417499<br>90422136-90425327 |
